# Supplementary material
Source: ML conference proceedings conference paper supplement (https://proceedings.neurips.cc/paper_files/paper/2022/hash/32d2cf79062126dc032ca4235068f52e-Abstract.html)
Supplement: Supplementary file 1 [file 32d2cf79062126dc032ca4235068f52e-Supplemental-Conference.zip]

Archive with 8 entries (7 files):
- ver-supp/
- ver-supp/ver_supp.pdf
- ver-supp/2-tp-srl.mp4
- ver-supp/4-place-into-drawer.mp4
- ver-supp/1-tp-srl-no-nav.mp4
- ver-supp/4-place-on-table.mp4
- ver-supp/3-pick-from-table.mp4
- ver-supp/3-pick-from-fridge.mp4
